# Supplementary material for: Construction of pillar[4]arene[1]quinone–1,10-dibromodecane pseudorotaxanes in solution and in the solid state
Source: publisher site journal article supplement (doi:10.3762/bjoc.16.245), 2020-12-02
Supplement: Additional file 1 [file 1860-5397-16-245-S1.pdf]

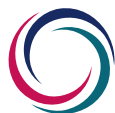

## Supporting Information

for

### **Construction of pillar[4]arene[1]quinone–1,10-dibromodecane pseudorotaxanes in solution and in the solid state**

Xinru Sheng, Errui Li and Feihe Huang

*Beilstein J. Org. Chem.* **2020**, *16*, 2954–2959. [doi:10.3762/bjoc.16.245](https://doi.org/10.3762/bjoc.16.245)

**Materials and methods, characterizations of H and G, crystallographic data, and characterization studies on the complexation between H and G in solution**

## Table of contents

|    |                                                                                                    |    |
|----|----------------------------------------------------------------------------------------------------|----|
| 1. | Materials and methods                                                                              | S1 |
| 2. | Characterizations of <b>H</b> and <b>G</b>                                                         | S2 |
| 3. | Crystallographic data of the [3]pseudorotaxane between <b>H</b><br>and <b>G</b> in the solid state | S4 |
| 4. | Characterization studies on the complexation between <b>H</b> and<br><b>G</b> in solution          | S5 |
| 5. | References                                                                                         | S9 |

### 1. Materials and methods

All reagents and solvents were commercially available and used as supplied without further purification. **H** was synthesized according to literature procedures.<sup>S1</sup> <sup>1</sup>H NMR spectra were recorded on a temperature-controlled 400 MHz, 500 MHz, or 600 MHz spectrometer with use of the deuterated solvent as the lock and the residual solvent or TMS as the internal reference. Matrix-assisted laser desorption/ionization time-of-flight mass spectrometry (MALDI-TOF MS) was recorded on a Bruker Ultraflex spectrometer with a 355 nm Nd:YAG laser (Smartbeam II) and a 25 kV ion source voltage. UV-vis spectra were taken on a Perkin-Elmer Lambda 35 UV-vis spectrophotometer.

## 2. Characterizations of **H** and **G**

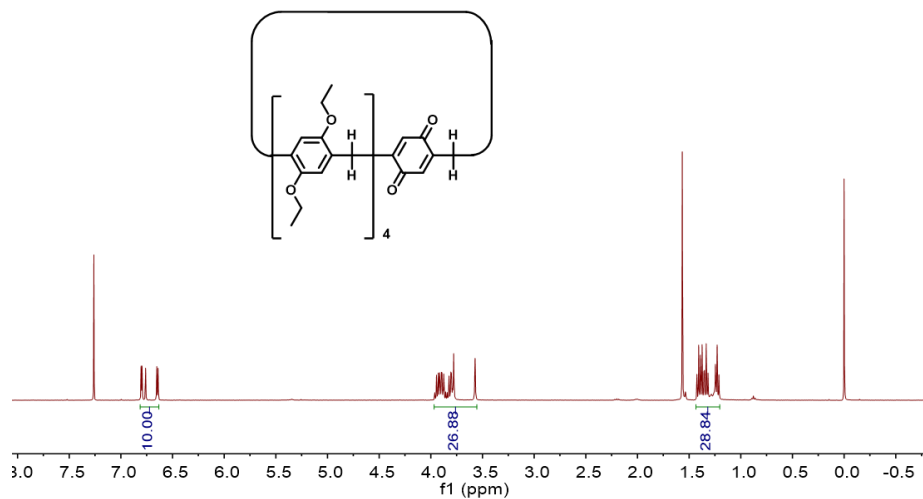

**Figure S1:** <sup>1</sup>H NMR spectrum (400 MHz, CDCl<sub>3</sub>, 298 K) of **H**.

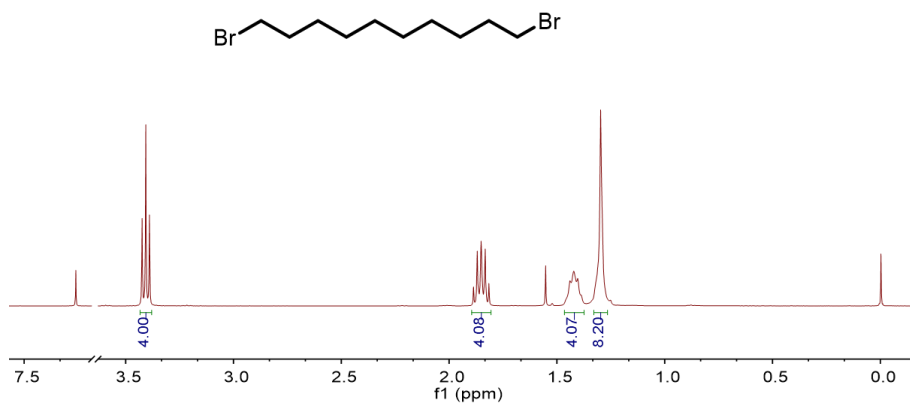

**Figure S2:** <sup>1</sup>H NMR spectrum (400 MHz, CDCl<sub>3</sub>, 298 K) of **G**.

### MALDI-TOF Mass Spectrum

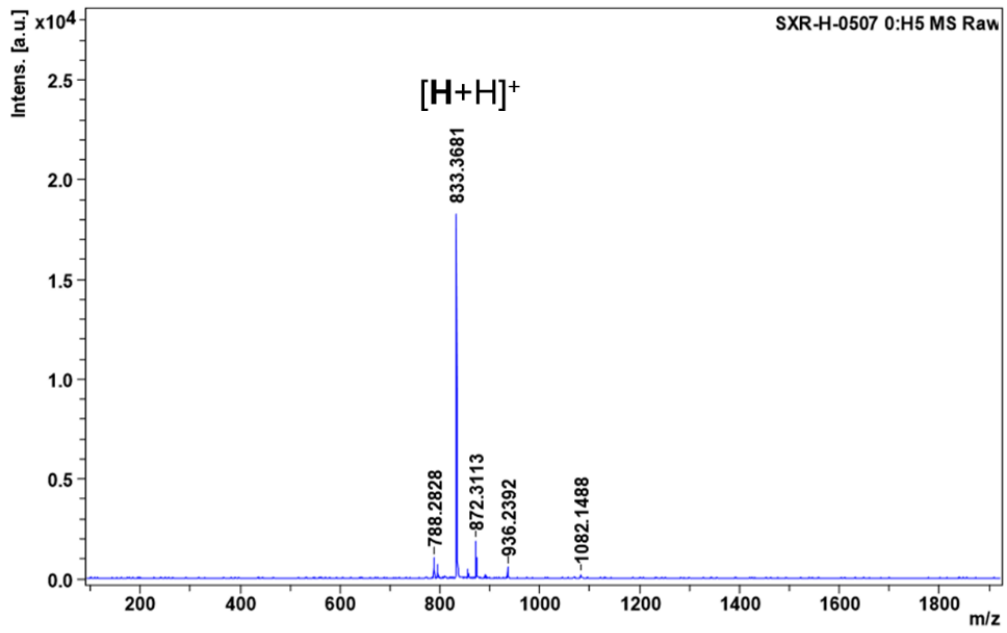

**Figure S3:** MALDI-TOF mass spectrum of **H**.

### 3. Crystallographic data of the [3]pseudorotaxane between **H** and **G** in the solid state

**Table S1:** Crystal data for single crystals of the [3]pseudorotaxane between **H** and **G** in the solid state.

|                                         |                                                                                                                                              |
|-----------------------------------------|----------------------------------------------------------------------------------------------------------------------------------------------|
| empirical formula                       | $C_{112}H_{140}Br_2O_{20}$                                                                                                                   |
| formula weight                          | 1966.06                                                                                                                                      |
| temperature                             | 170 K                                                                                                                                        |
| wavelength                              | 0.71073                                                                                                                                      |
| crystal system                          | monoclinic                                                                                                                                   |
| space group                             | $P 1 2_1/c 1$                                                                                                                                |
| unit cell dimensions                    | $a = 17.4426(6) \text{ \AA}$ $\alpha = 90$<br>$b = 19.3528(8) \text{ \AA}$ $\beta = 96.800(1)$<br>$c = 15.3931(4) \text{ \AA}$ $\gamma = 90$ |
| volume                                  | 5159.6(3)                                                                                                                                    |
| Z                                       | 4                                                                                                                                            |
| density (calculated)                    | 1.265 g/cm <sup>-3</sup>                                                                                                                     |
| absorption coefficient                  | 0.854                                                                                                                                        |
| $F(000)$                                | 2084.0                                                                                                                                       |
| crystal size                            | 0.336 × 0.139 × 0.116 mm <sup>3</sup>                                                                                                        |
| $\theta$ range for data collection      | 2.35 to 27.40°                                                                                                                               |
| index ranges                            | -19 ≤ h ≤ 22, -25 ≤ k ≤ 20, -19 ≤ l ≤ 19                                                                                                     |
| reflections collected                   | 41520                                                                                                                                        |
| independent reflections                 | 11778 [ $R(\text{int}) = 0.0705$ ]                                                                                                           |
| completeness to $\theta = 27.492^\circ$ | 0.996                                                                                                                                        |
| absorption correction                   | multiscan                                                                                                                                    |
| max. and min. transmission              | 0.746, 0.686                                                                                                                                 |
| data/restraints/parameters              | 11778/0/612                                                                                                                                  |
| goodness-of-fit on $F^2$                | 1.046                                                                                                                                        |
| final $R$ indices [ $I > 2\sigma(I)$ ]  | $R1 = 0.0480$ , $wR2 = 0.0511$                                                                                                               |
| $R$ indices (all data)                  | $R1 = 0.0705$ , $wR2 = 0.0672$                                                                                                               |
| largest diff. peak and hole             | 0.561, -0.709 e. $\text{\AA}^{-3}$                                                                                                           |
| CCDC                                    | 2031286                                                                                                                                      |

4. Characterization studies on the complexation between **H** and **G** in solution

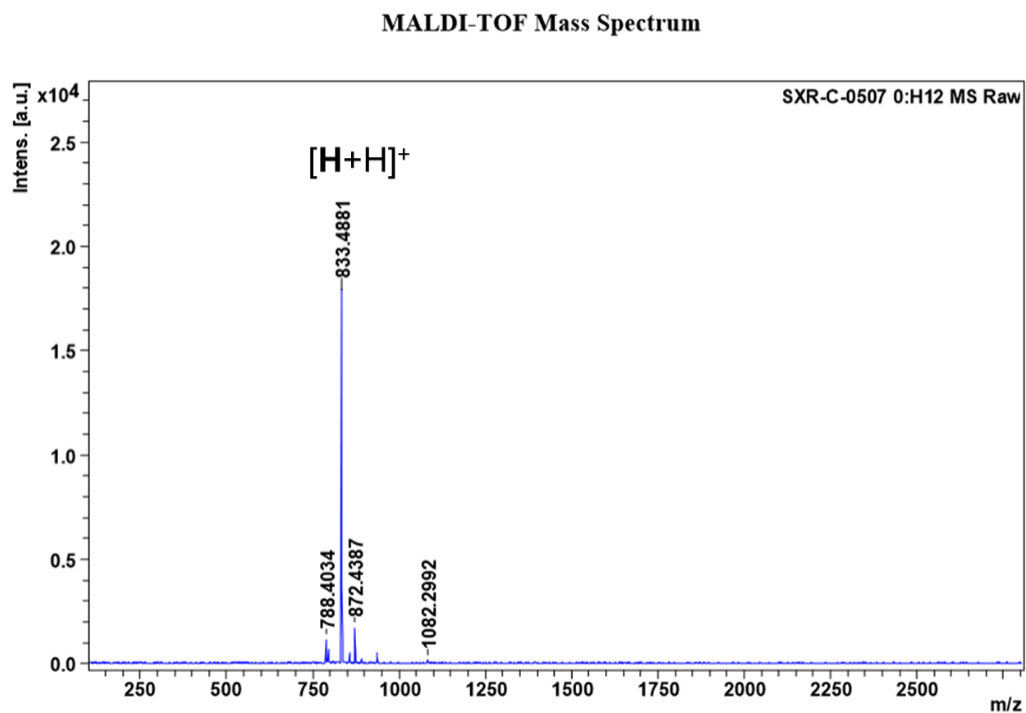

**Figure S4:** MALDI-TOF mass spectrum of **H** and **G**. There only exist the peaks of **H**.

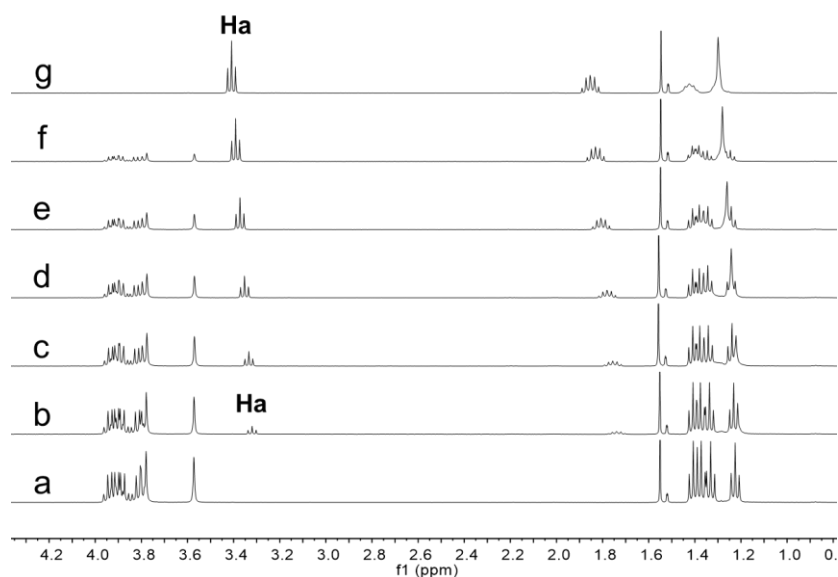

**Figure S5:** Partial  $^1\text{H}$  NMR spectra (500 MHz, chloroform-*d*, 298 K): (a) 6.00 mM **H**; (b) 1.00 mM **G** and 5.00 mM **H**; (c) 2.00 mM **G** and 4.00 mM **H**; (d) 3.00 mM **G** and 3.00 mM **H**; (e) 4.00 mM **G** and 2.00 mM **H**; (f) 5.00 mM **G** and 1.00 mM **H**; (g) 6.00 mM **G**.

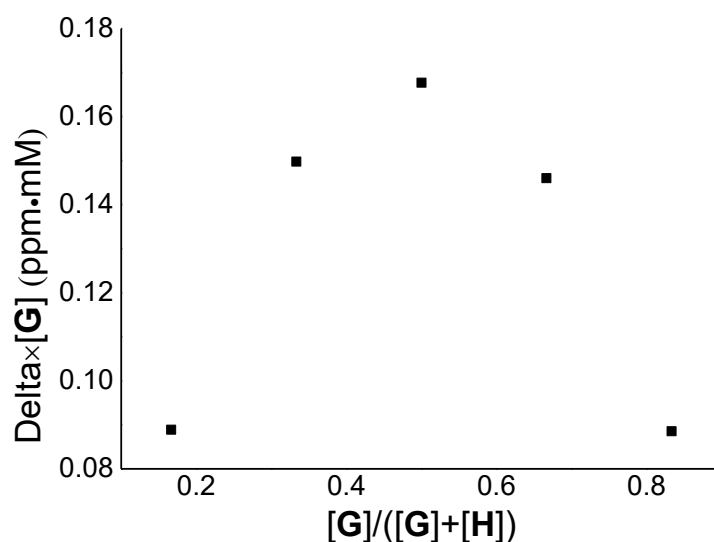

**Figure S6:** Job plot showing the 1:1 stoichiometry of the complexation between **H** and **G** in chloroform-*d* using the proton NMR data for  $\text{H}_a$ . Delta is the chemical shift change of  $\text{H}_a$ .  $[\text{H}] + [\text{G}] = 6.00$  mM.  $[\text{H}]$  and  $[\text{G}]$  are concentrations of **H** and **G**, respectively.

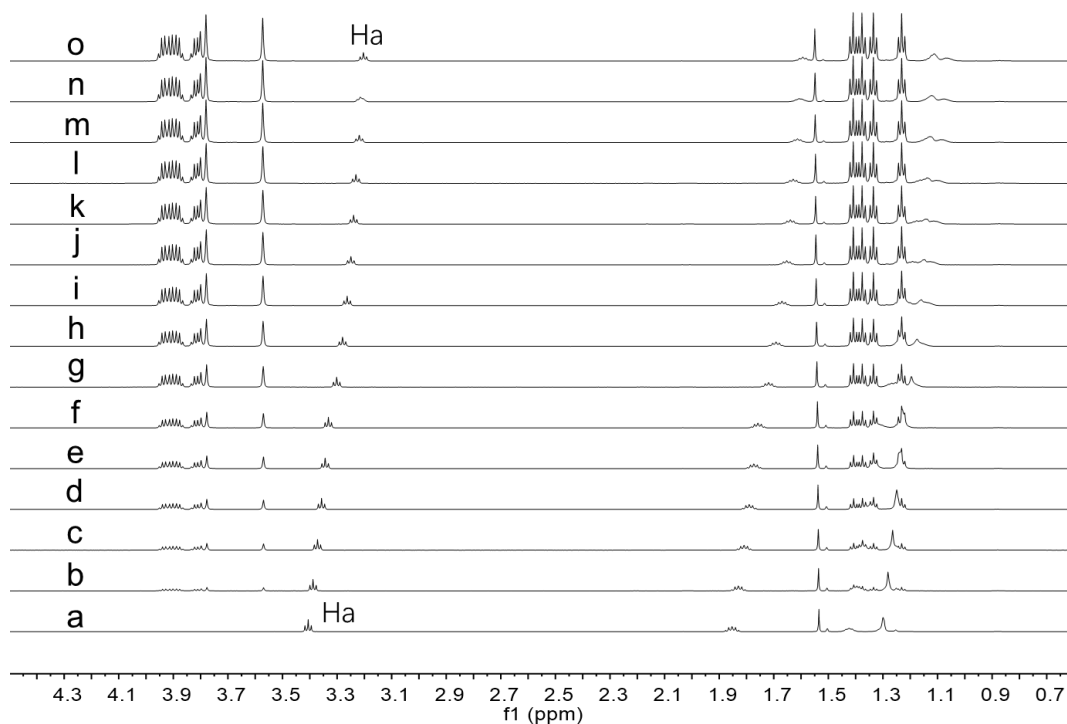

**Figure S7:** Partial <sup>1</sup>H NMR spectra (600 MHz, chloroform-*d*, 298 K) of **G** at the concentration of 5.00 mM upon addition of **H**: (a) 0 mM; (b) 1.16 mM; (c) 2.20 mM; (d) 3.14 mM; (e) 3.98 mM; (f) 4.74 mM; (g) 6.85 mM; (h) 8.47 mM; (i) 9.74 mM; (j) 10.77 mM; (k) 11.63 mM; (l) 12.34 mM; (m) 13.47 mM; (n) 14.33 mM; (o) 15.00 mM.



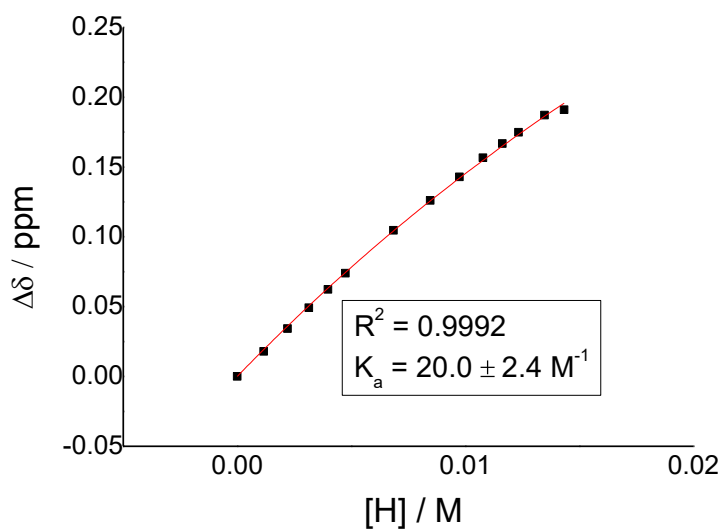

**Figure S8:** The chemical shift changes upon addition of **H**. The red solid line was obtained from the non-linear curve-fitting equation,<sup>S2</sup>  $y = \frac{P1}{[\mathbf{G}] (0.5x+0.5 ([\mathbf{G}]+P2)-(0.5(x^2+(2x(P2-[\mathbf{G}]))+(P2+[\mathbf{G}]^2)^{0.5}))}$ , where  $y = \Delta\delta$ ,  $P1 = \Delta\delta_{\text{max}}$ ,  $P2 = 1/K_a$ , and  $x = [\mathbf{H}]$ .

## 5. References

- S1. Han, C.; Zhang, Z.; Yu, G.; Huang, F. *Chem. Commun.*, **2012**, *48*, 9876–9878.
- S2. Zhu, X.-Z.; Chen, C.-F. *J. Org. Chem.*, **2005**, *70*, 917–924.
